# Supplementary material
Source: PubMed Central journal article supplement (PMC5392438)

A.

### Encoding

#### Bilateral mPFC

R FFA

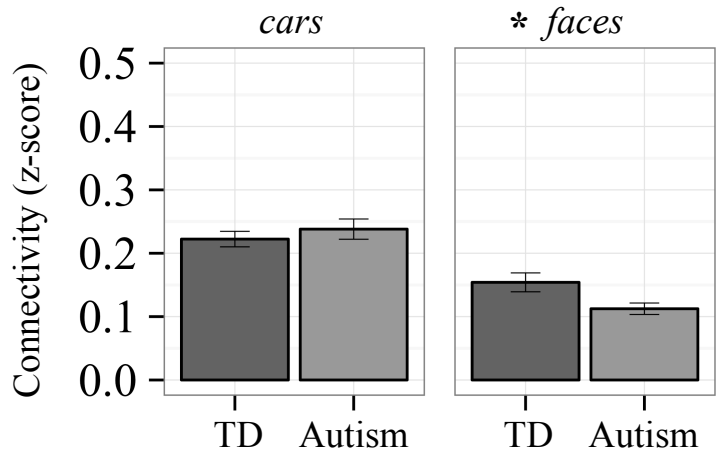

B.

### Recognition

R FFA

#### Bilateral visual cortex

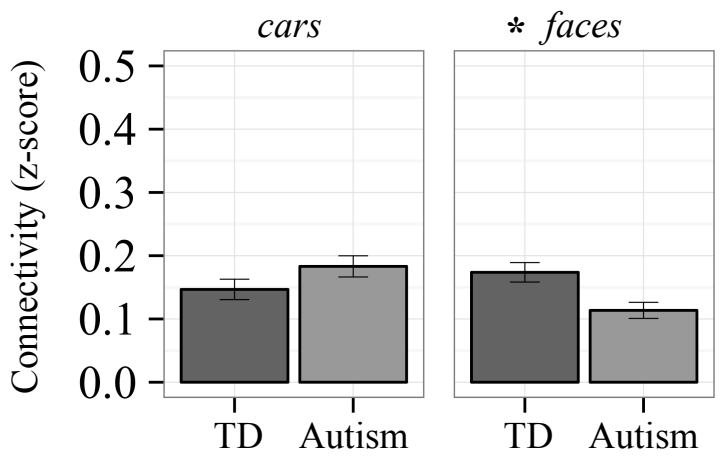

#### L anterior STG

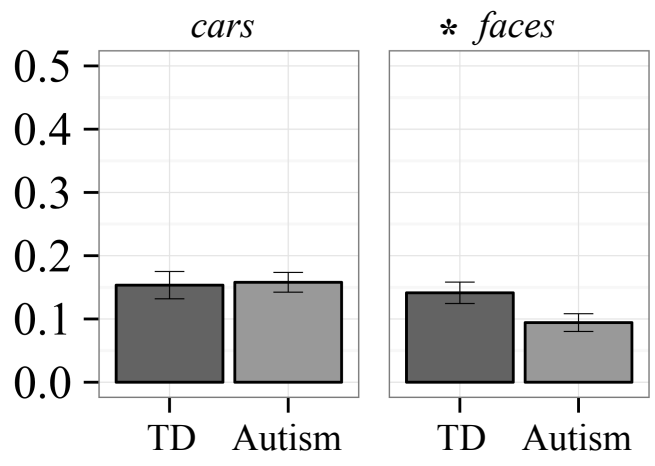

R FFA

#### R TPJ

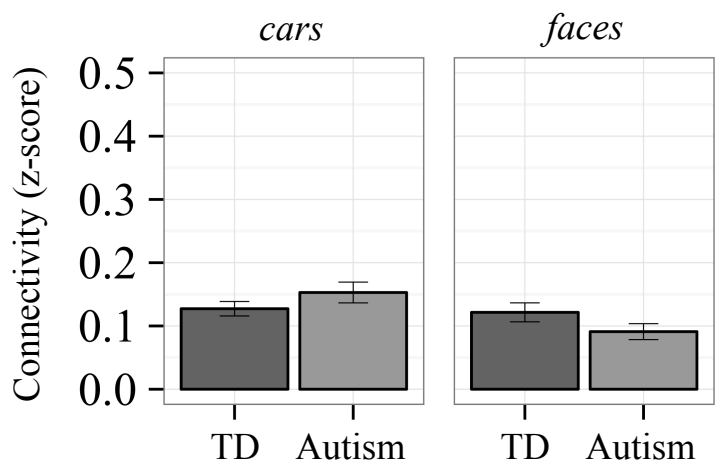

#### L somatosensory cortex

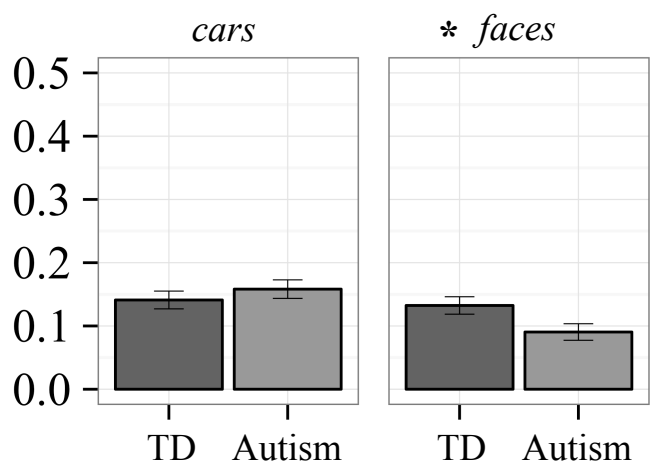

L FFA

#### L rostral IPFC

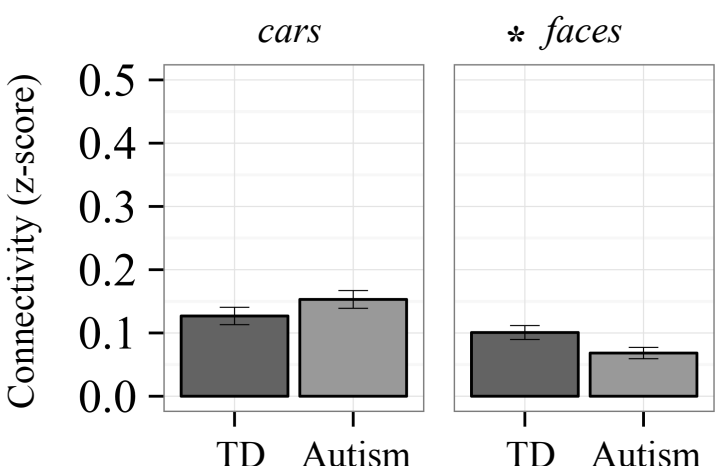

#### L dorsal IPFC

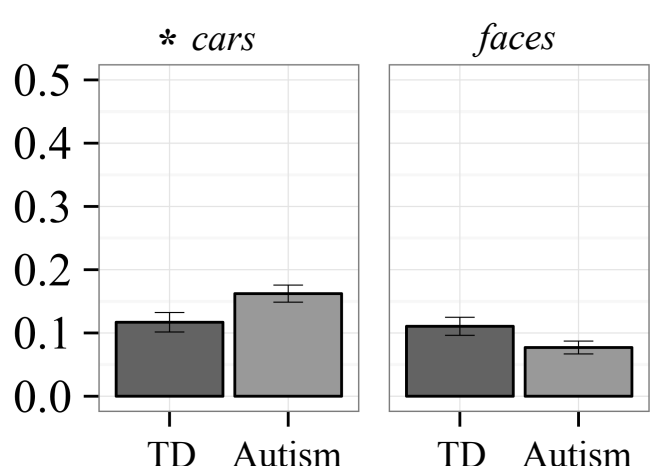

Supplement: NIHMS812611-supplement-Supp_Fig_S2.pdf [file NIHMS812611-supplement-Supp_Fig_S2.pdf]
