# Supplementary material
Source: PubMed Central journal article supplement (PMC5392438)

A.

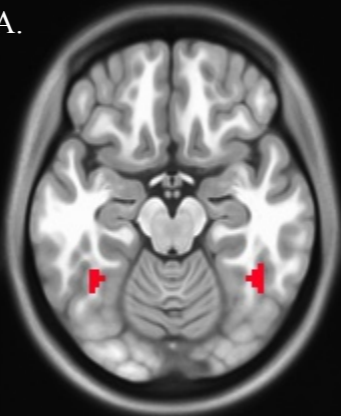

B.

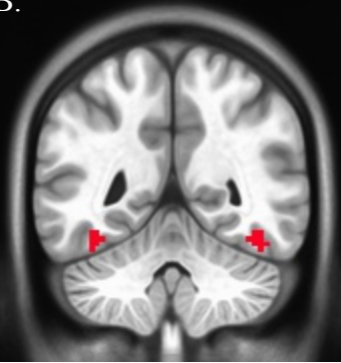

Supplement: NIHMS812611-supplement-Supp_Fig_S1.pdf [file NIHMS812611-supplement-Supp_Fig_S1.pdf]

**A. Encoding**

**L motor cortex**

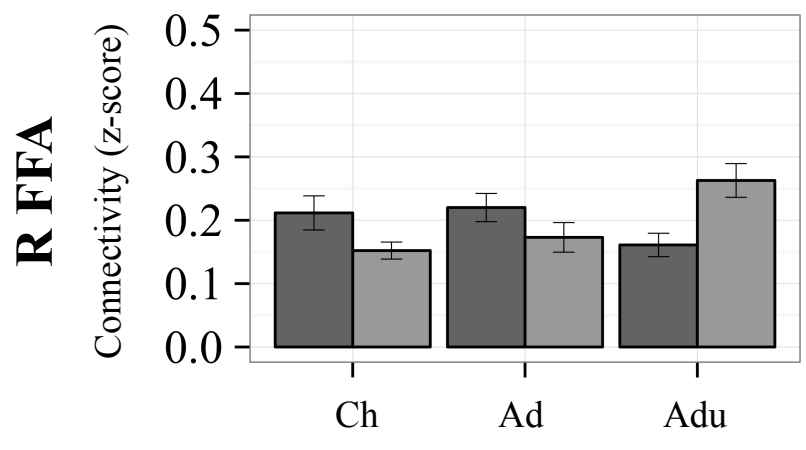

**B. Recognition**

**L amygdala**

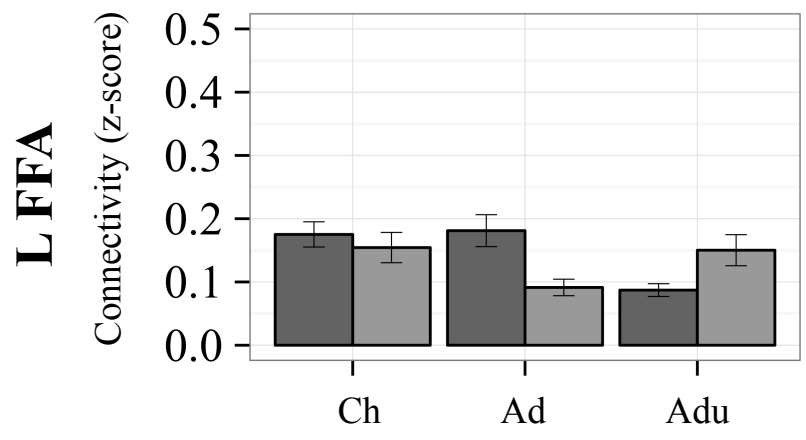

**R dorsal striatum**

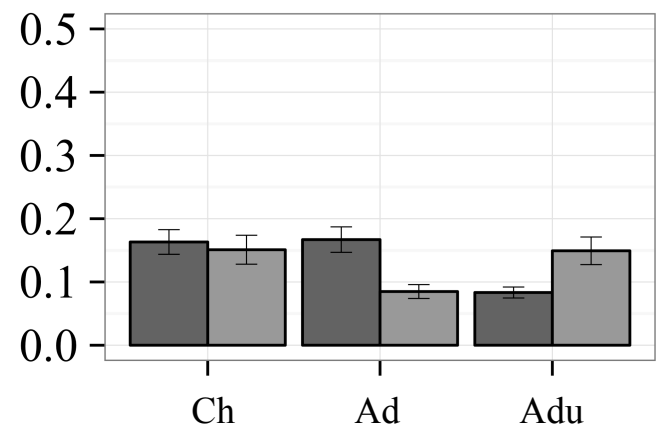

**R visual cortex**

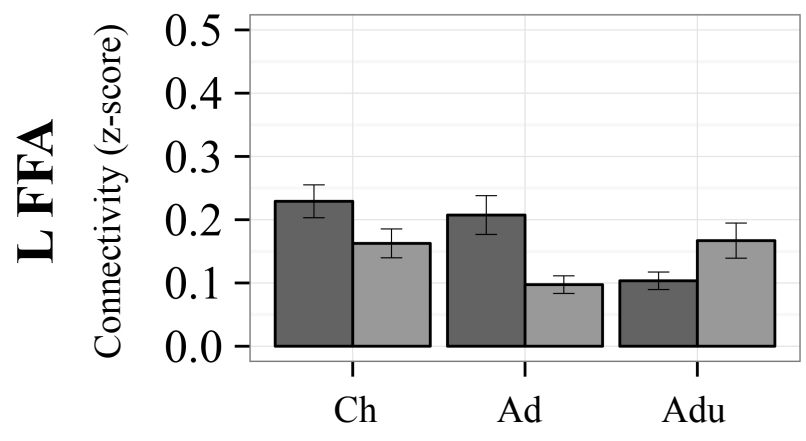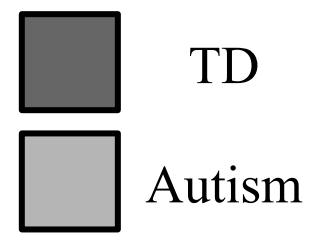

Supplement: NIHMS812611-supplement-Supp_Fig_S3.pdf [file NIHMS812611-supplement-Supp_Fig_S3.pdf]
